# Supplementary material for: Antidepressants and the risk of hyponatremia: a Danish register-based population study
Source: PubMed Central journal article supplement — BMJ Open. 2016 May 18;6(5):e011200. doi: 10.1136/bmjopen-2016-011200 (PMC4874104; doi:10.1136/bmjopen-2016-011200), 2016-05-18
Supplement: bmjopen-2016-011200supp_appendixA.pdf [file bmjopen-2016-011200supp_appendixA.pdf]

**Appendix A:** The percentage of individuals who had p-sodium measured within 6 months after initiating treatment shown for each antidepressant

| Antidepressant | % who had p-sodium measured |
|----------------|-----------------------------|
| Amitriptyline  | 32.96                       |
| Clomipamine    | 29.83                       |
| Nortriptyline  | 41.48                       |
| Citalopram     | 34.37                       |
| Escitalopram   | 28.28                       |
| Fluoxetine     | 19.85                       |
| Paroxetine     | 24.57                       |
| Sertraline     | 28.59                       |
| Duloxetine     | 32.29                       |
| Venlafaxine    | 27.88                       |
| Mianserin      | 27.99                       |
| Mirtazapine    | 34.25                       |
