# Supplementary material for: Antidepressants and the risk of hyponatremia: a Danish register-based population study
Source: PubMed Central journal article supplement — BMJ Open. 2016 May 18;6(5):e011200. doi: 10.1136/bmjopen-2016-011200 (PMC4874104; doi:10.1136/bmjopen-2016-011200), 2016-05-18
Supplement: bmjopen-2016-011200supp_appendixB.pdf [file bmjopen-2016-011200supp_appendixB.pdf]

Appendix B: Incidence rate ratios for severe hyponatremia (defined as plasma-sodium <130 mmol/l) for specific antidepressants.

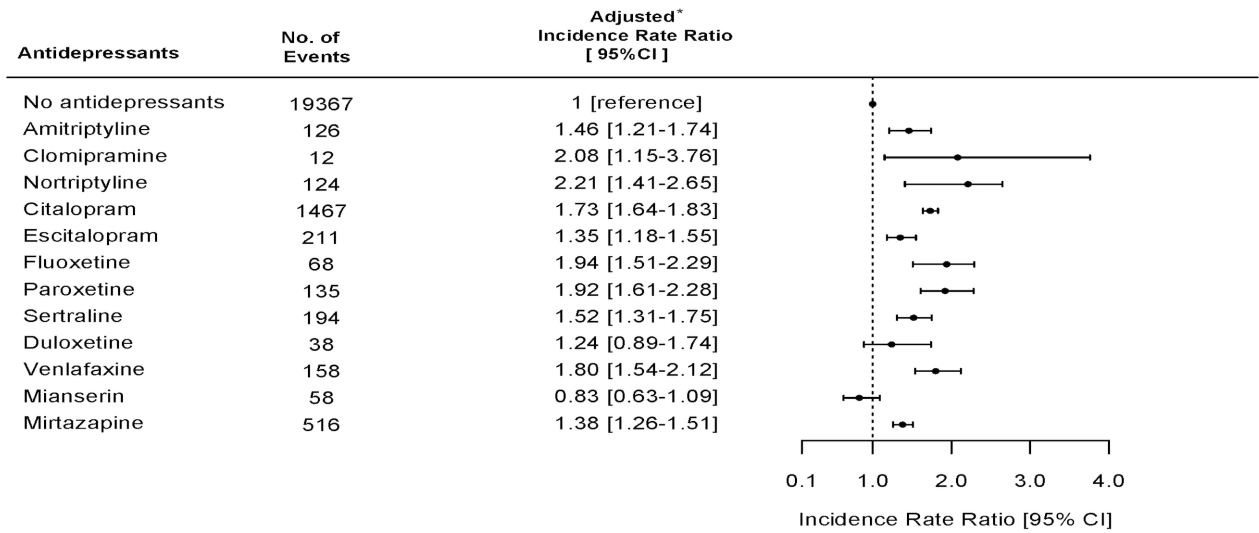

\*Adjusted for age, time, sex, comorbidities and concurrent pharmacotherapy with diuretics, antiepileptic drugs and other antidepressants.
